# Supplementary material for: Multifunctional sandwich-like mesoporous silica–Fe3O4–graphene oxide nanocomposites for removal of methylene blue from water
Source: Royal Society of Chemistry journal article supplement (doi:10.1039/c5ra04858c), 2015-01-01
Supplement: c5ra04858c1.pdf [file c5ra04858c1.pdf]

## Supporting Information

### **Multifunctional sandwich-like mesoporous silica-Fe<sub>3</sub>O<sub>4</sub>-graphene oxide nanocomposites for removal of methylene blue from water**

Fubo Gu, Man Liang, Dongmei Han, Zhihua Wang\*

State Key Laboratory of Chemical Resource Engineering, Beijing University of  
Chemical Technology, Beijing 100029, China

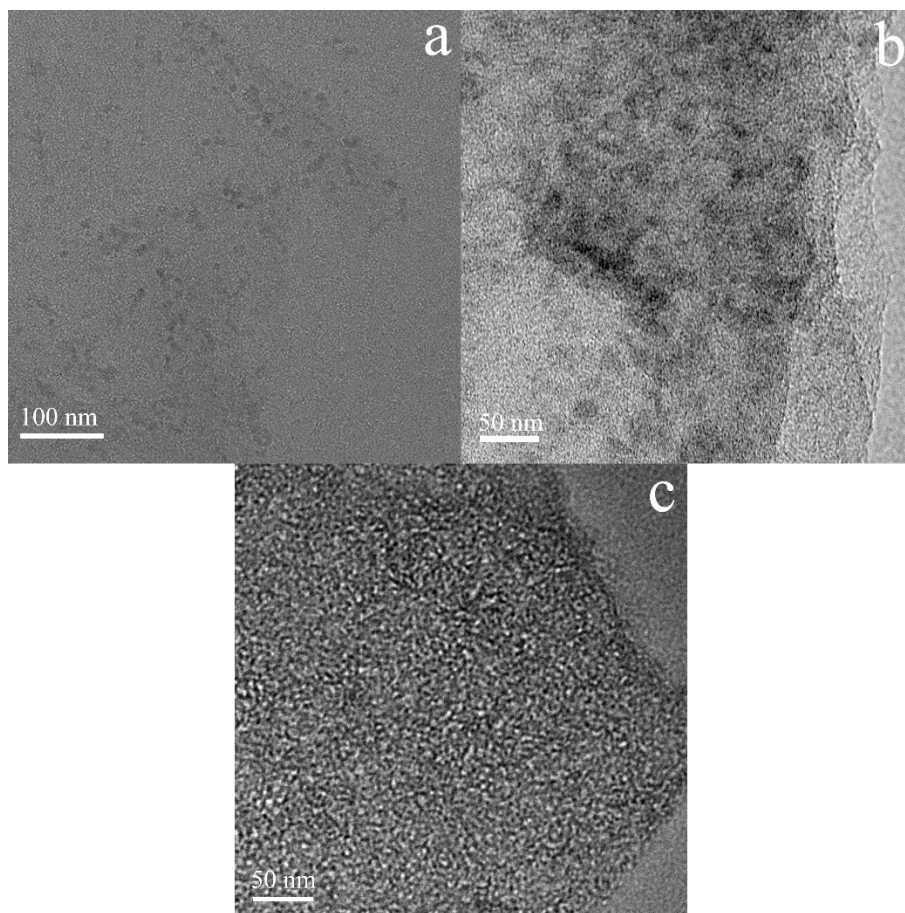

Fig.S1 TEM images of Fe<sub>3</sub>O<sub>4</sub>/GO (a), Fe<sub>3</sub>O<sub>4</sub>/GO@mSiO<sub>2</sub> (b), GO@mSiO<sub>2</sub> (c)

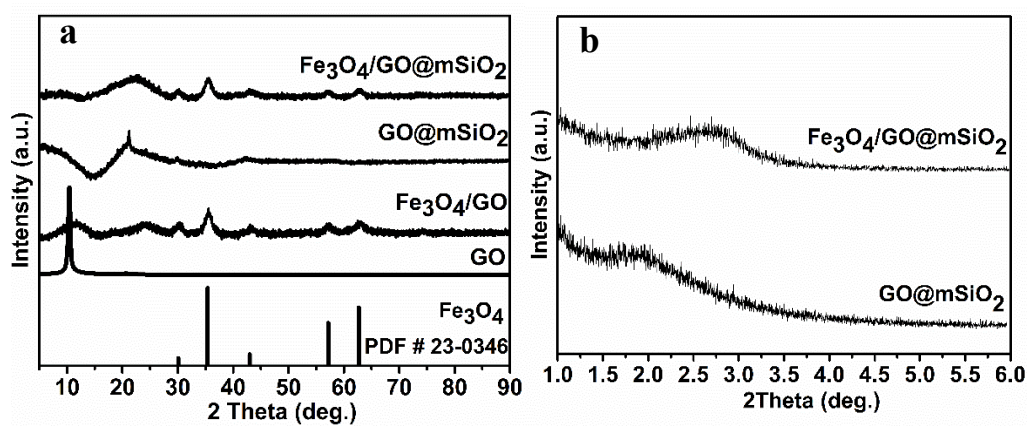

Fig.S2 XRD patterns (a) of GO, Fe<sub>3</sub>O<sub>4</sub>/GO, GO@mSiO<sub>2</sub> and Fe<sub>3</sub>O<sub>4</sub>/GO@mSiO<sub>2</sub>

Low-angle XRD patterns (b) of GO@mSiO<sub>2</sub> and Fe<sub>3</sub>O<sub>4</sub>/GO@mSiO<sub>2</sub>

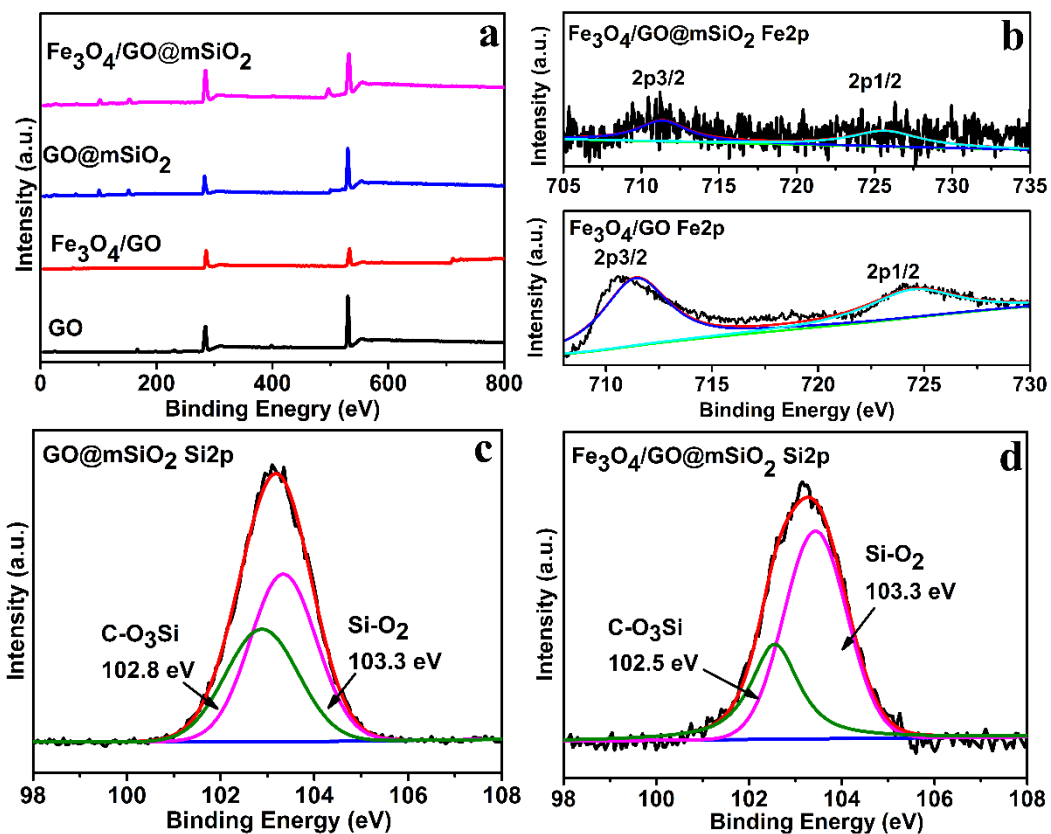

Fig.S3 XPS spectra of GO, Fe<sub>3</sub>O<sub>4</sub>/GO, GO@mSiO<sub>2</sub> and Fe<sub>3</sub>O<sub>4</sub>/GO@mSiO<sub>2</sub>

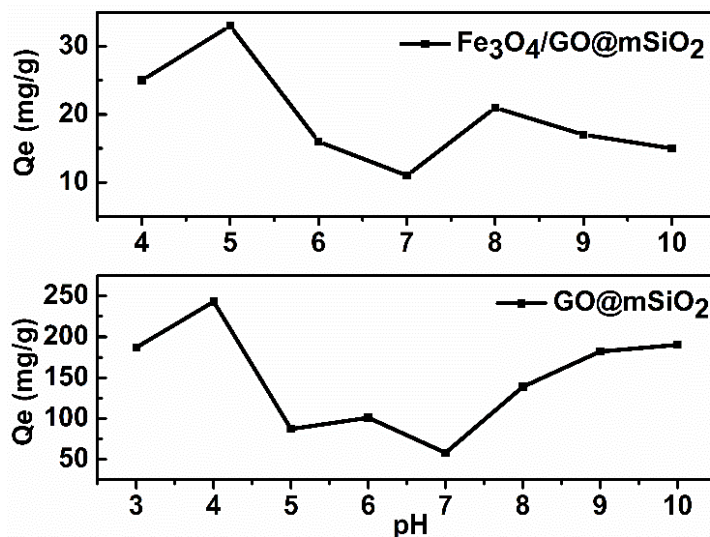

Fig.S4 Influence of pH on the adsorption capacity of Fe<sub>3</sub>O<sub>4</sub>/GO@mSiO<sub>2</sub> (a) and GO@mSiO<sub>2</sub> (b)

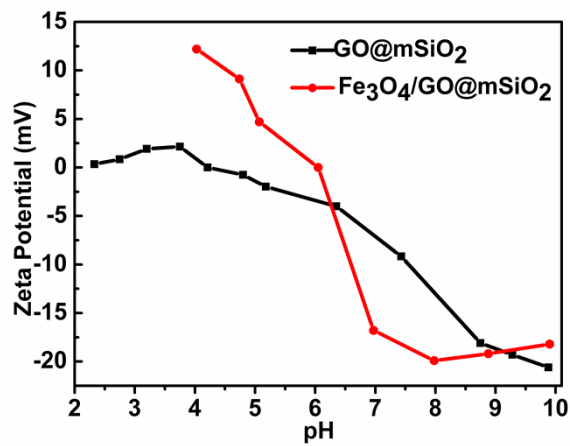

Fig. S5 Zeta potential vs. pH curves of Fe<sub>3</sub>O<sub>4</sub>/GO@mSiO<sub>2</sub> and GO@mSiO<sub>2</sub>

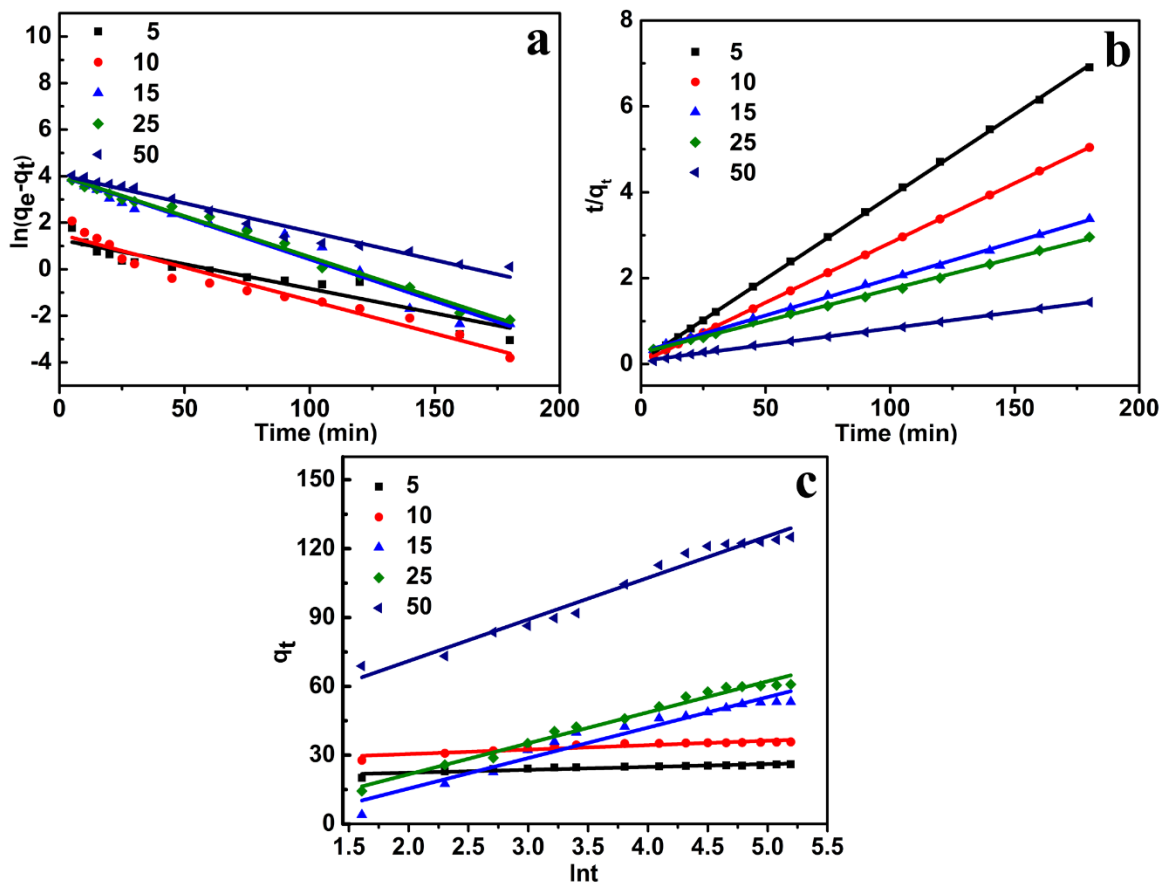

Fig.S6 Adsorption models of pseudo-first-order (a), pseudo-second-order (b), Elovich (c) onto Fe<sub>3</sub>O<sub>4</sub>/GO@mSiO<sub>2</sub>

Table S1 Coefficients of a pseudo-first-order and Elovich kinetic models for MB on  $\text{Fe}_3\text{O}_4/\text{GO@mSiO}_2$

| $C_0$<br>(mg/L) | $q_{e,exp}$<br>(mg/g) | Pseudo-first order    |                                |        | Elovich                                      |                                              |        |
|-----------------|-----------------------|-----------------------|--------------------------------|--------|----------------------------------------------|----------------------------------------------|--------|
|                 |                       | $q_{e,cal}$<br>(mg/g) | $k_1$<br>( $\text{min}^{-1}$ ) | $R^2$  | $\alpha$<br>( $\text{mg/g}\cdot\text{min}$ ) | $\beta$<br>( $\text{g}\cdot\text{mg}^{-1}$ ) | $R^2$  |
| 5               | 34.0                  | 18.8                  | 0.02108                        | 0.8710 | 400.28                                       | 0.079                                        | 0.8242 |
| 10              | 42.0                  | 31.9                  | 0.02844                        | 0.9478 | $1.11 \times 10^4$                           | 0.5168                                       | 0.8427 |
| 15              | 53.2                  | 32.8                  | 0.03586                        | 0.9579 | 0.4501                                       | 0.075                                        | 0.9437 |
| 25              | 60.8                  | 63.6                  | 0.03505                        | 0.9901 | 33.47                                        | 0.0702                                       | 0.9796 |
| 50              | 125.1                 | 114.8                 | 0.02443                        | 0.9716 | 1444.23                                      | 0.074                                        | 0.9676 |

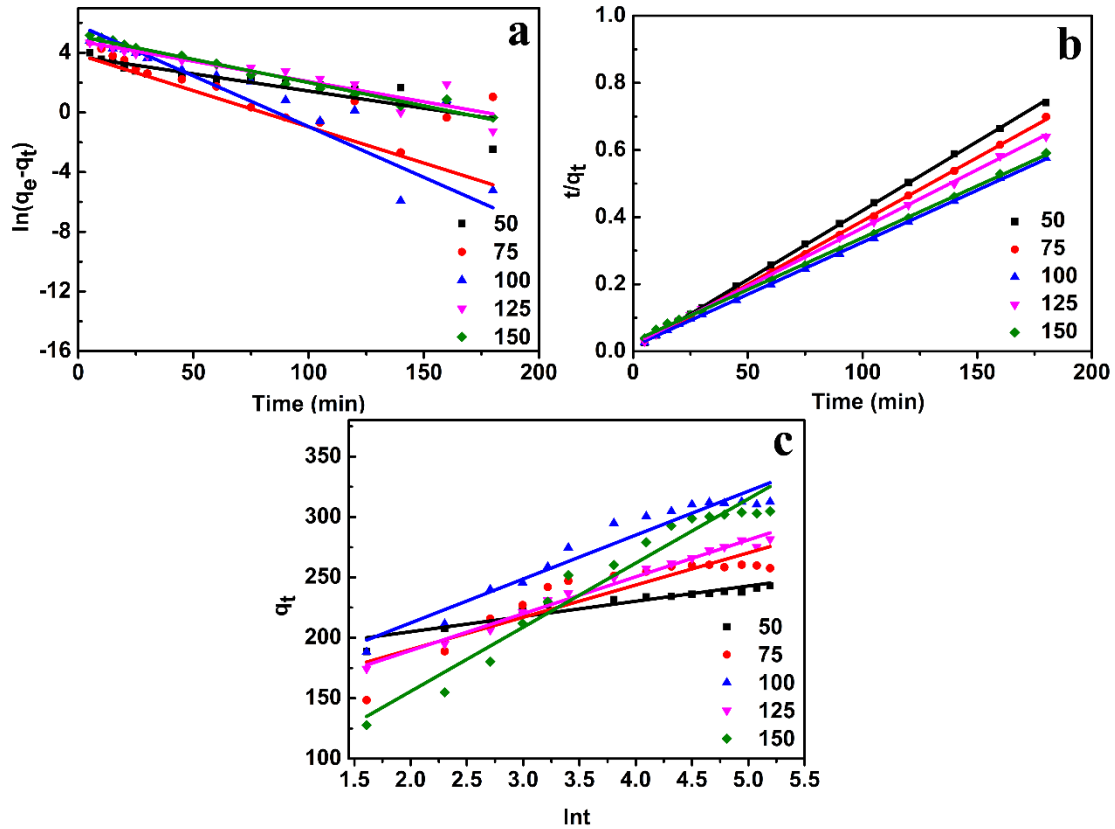

Fig.S7 Adsorption models of pseudo-first-order (a), pseudo-second-order (b), Elovich (c) onto  $\text{GO@mSiO}_2$

Table S2 Coefficients of a pseudo-first-order and Elovich kinetic models for MB on  $\text{GO@mSiO}_2$

| $C_0$<br>(mg/L) | $q_{e,exp}$<br>(mg/g) | Pseudo-first order    |                                |        | Elovich                                      |                                              |        |
|-----------------|-----------------------|-----------------------|--------------------------------|--------|----------------------------------------------|----------------------------------------------|--------|
|                 |                       | $q_{e,cal}$<br>(mg/g) | $k_1$<br>( $\text{min}^{-1}$ ) | $R^2$  | $\alpha$<br>( $\text{mg/g}\cdot\text{min}$ ) | $\beta$<br>( $\text{g}\cdot\text{mg}^{-1}$ ) | $R^2$  |
| 50              | 243.3                 | 42.2                  | 0.02306                        | 0.7544 | $1.96 \times 10^4$                           | 0.07927                                      | 0.8837 |
| 75              | 260.7                 | 48.4                  | 0.04846                        | 0.2956 | 4548                                         | 0.03751                                      | 0.7923 |
| 100             | 270.4                 | 345.7                 | 0.06793                        | 0.6669 | 1698                                         | 0.02753                                      | 0.9346 |
| 125             | 281.8                 | 119.8                 | 0.02711                        | 0.8634 | 2052                                         | 0.03277                                      | 0.9841 |
| 150             | 305.3                 | 166.2                 | 0.03113                        | 0.9727 | 134.9                                        | 0.01883                                      | 0.9486 |

Table S3 Comparison of the adsorption capacities of MB onto various adsorbents

| Adsorbent                                            | $q_{max}$<br>(mg/g) | BET<br>(m <sup>2</sup> /g) | $Q_m$<br>(mg/m <sup>2</sup> ) | Conc.<br>(mg/L) | pH   | Isotherm               | Ref          |
|------------------------------------------------------|---------------------|----------------------------|-------------------------------|-----------------|------|------------------------|--------------|
| graphene-<br>Fe <sub>3</sub> O <sub>4</sub> @carbon  | 73.3                | -                          | -                             | 50              | acid | Langmuir               | [1]          |
| Fe <sub>3</sub> O <sub>4</sub> -SiO <sub>2</sub> -GO | 97.0                | -                          | -                             | 25-35           | -    | Langmuir               | [2]          |
| Fe <sub>3</sub> O <sub>4</sub> -G-MWCNT              | 65.8                | -                          | -                             | 10-30           | 6.4  | Freundlich             | [3]          |
| magnetic-GO                                          | 64.2                | -                          | -                             | -               | 8    | Langmuir               | [4]          |
| MCM-22                                               | 57.6                | 490                        | 0.118                         | -               | -    | Langmuir               | [5]          |
| SBA-15                                               | 49.0                | 659                        | 0.074                         | -               | 5.5  | Freundlich             | [6]          |
| MCM-41                                               | 48.0                | 1,059                      | 0.045                         | -               | 11   | Redlich-peterson model | [7]          |
| Fe <sub>3</sub> O <sub>4</sub> /GO@mSiO <sub>2</sub> | 125.1               | 179                        | 0.698                         | 5-50            | 5    | Langmuir               | Present work |
| GO@mSiO <sub>2</sub>                                 | 305.3               | 634                        | 0.369                         | 50-150          | 4    | Langmuir               | Present work |

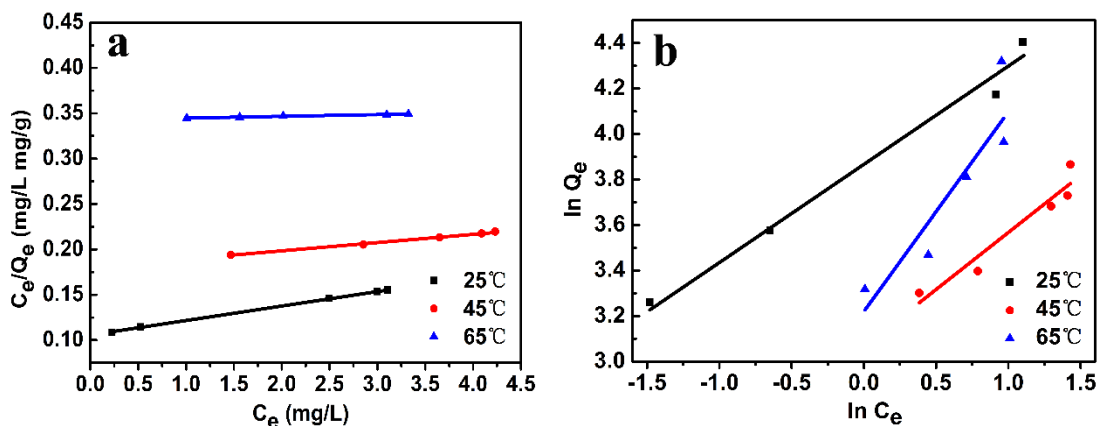

Fig.S8 Langmuir (a) and Freundlich (b) adsorption isotherm for MB onto Fe<sub>3</sub>O<sub>4</sub>/GO@mSiO<sub>2</sub>

Table S4 Parameters of Langmuir and Freundlich adsorption for MB onto Fe<sub>3</sub>O<sub>4</sub>/GO@mSiO<sub>2</sub>

| T<br>(°C) | Langmuir            |              |        | Freundlich |        |        |
|-----------|---------------------|--------------|--------|------------|--------|--------|
|           | $q_{max}$<br>(mg/g) | $b$<br>(L/g) | $R^2$  | $n$        | $K$    | $R^2$  |
| 25        | 62.7                | 592.80       | 0.9994 | 0.432      | 7354.5 | 0.6813 |
| 45        | 110.0               | 0.0016       | 0.9989 | 1.995      | 1164.7 | 0.9193 |
| 65        | 121.7               | 1511.5       | 0.9922 | 1.137      | 1657.2 | 0.7794 |

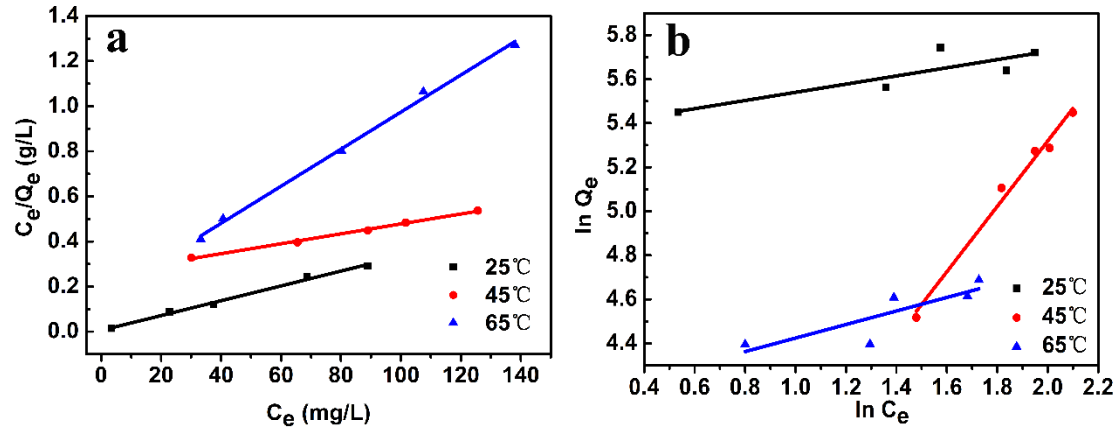

Fig.S9 Langmuir (a) and Freundlich (b) adsorption isotherm for MB onto GO@mSiO<sub>2</sub>

Table S5 Parameters of Langmuir and Freundlich adsorption for MB onto GO@mSiO<sub>2</sub>

| T<br>(°C) | Langmuir            |               |        | Freundlich |       |        |
|-----------|---------------------|---------------|--------|------------|-------|--------|
|           | $q_{max}$<br>(mg/g) | $b$<br>(L/mg) | $R^2$  | $n$        | $K$   | $R^2$  |
| 25        | 312.5               | 0.5423        | 0.9916 | 5.38       | 211.6 | 0.6684 |
| 45        | 454.5               | 0.0085        | 0.9960 | 0.67       | 10.48 | 0.9813 |
| 65        | 121.7               | 0.0541        | 0.9958 | 3.25       | 61.35 | 0.6146 |

Table S6 Thermodynamic parameters for MB adsorbed onto Fe<sub>3</sub>O<sub>4</sub>/GO@mSiO<sub>2</sub>

| $T$<br>(K) | $Q_e$<br>(mg/g) | $K_d$ | $\Delta G$<br>(kJ/mol) | $\Delta H$<br>(kJ/mol) | $\Delta S$<br>(J/mol·K) |
|------------|-----------------|-------|------------------------|------------------------|-------------------------|
| 298        | 26.1            | 4.16  | -11.7                  |                        |                         |
| 318        | 24.1            | 1.83  | -8.83                  | -1928.1                | -5547.1                 |
| 338        | 22.8            | 1.05  | -8.74                  |                        |                         |

Table S7 Thermodynamic parameters for MB adsorbed onto GO@mSiO<sub>2</sub>

| $T$<br>(K) | $Q_e$<br>(mg/g) | $K_d$ | $\Delta G$<br>(kJ/mol) | $\Delta H$<br>(kJ/mol) | $\Delta S$<br>(J/mol·K) |
|------------|-----------------|-------|------------------------|------------------------|-------------------------|
| 298        | 243.3           | 4.22  | -10.3                  |                        |                         |
| 318        | 91.61           | 1.11  | -4.84                  | -65.40                 | 186.73                  |
| 338        | 81.09           | 0.89  | -2.95                  |                        |                         |

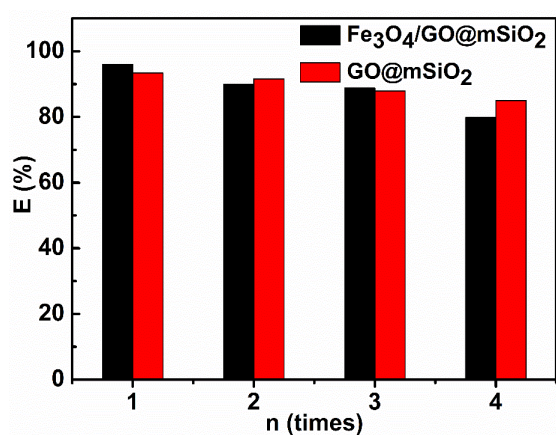

Fig. S10 Multicyclic adsorption efficiency of Fe<sub>3</sub>O<sub>4</sub>/GO@mSiO<sub>2</sub> and GO@mSiO<sub>2</sub>

## References

- 1 W. Fan, W. Gao, C. Zhang, W. Tjiu, J. Pan and T. Liu, *J. Mater. Chem.*, 2012, **22**, 25108-25115.
- 2 Y. Yao, S. Miao, S. Yu, L. Ma, H. Sun and S. Wang, *Colloid. Interf. Sci.*, 2012, **379**, 20-27.
- 3 P. Wang, M. Cao, C. Wang, Y. Ao, J. Hou and J. Qian, *Appl. Surf. Sci.*, 2014, **290**, 116-124.
- 4 J. Deng, X. Zhang, G. Zeng, J. Gong, Q. Niu and J. Liang, *Chem. Eng. J.*, 2013, **226**, 189-200.
- 5 S. Wang, H. Li and L. Xu, *J. Colloid. Interf. Sci.*, 2006, **295**, 71-78.
- 6 C. H. Huang, K. P. Chang, H. D. Ou, Y. C. Chiang and C. F. Wang, *Micropor. Mesopor. Mat.*, 2011, **141**, 102-109.
- 7 P. Monash and G. Pugazhenth, *Korean. J. Chem. Eng.*, 2010, **27**, 1184-1191.
